# Supplementary material for: Identifying PLAUR as a Pivotal Gene of Tumor Microenvironment and Regulating Mesenchymal Phenotype of Glioblastoma
Source: MDPI journal article supplement (doi:10.3390/cancers16040840), 2024-02-19
Supplement: s1 [file s1]

**Table S5:** Prognosis-associated genes defined by univariate Cox analysis

| Gene Symbol | HR    | HR.95L | HR.95H | pvalue |
|-------------|-------|--------|--------|--------|
| HSPA7       | 2.214 | 1.465  | 3.345  | 0      |
| PLAUR       | 1.943 | 1.299  | 2.908  | 0.001  |
| TNFSF14     | 2.004 | 1.338  | 3      | 0.001  |
| FCGR2C      | 2.001 | 1.34   | 2.99   | 0.001  |
| MT1H        | 1.942 | 1.303  | 2.892  | 0.001  |
| PDZK1IP1    | 1.93  | 1.289  | 2.891  | 0.001  |
| HK3         | 1.858 | 1.244  | 2.776  | 0.002  |
| THBD        | 1.908 | 1.268  | 2.87   | 0.002  |
| CHI3L2      | 1.858 | 1.241  | 2.781  | 0.003  |
| VDR         | 1.796 | 1.201  | 2.686  | 0.004  |
| GJB2        | 1.813 | 1.205  | 2.728  | 0.004  |
| AQP9        | 1.789 | 1.195  | 2.677  | 0.005  |
| STC1        | 1.774 | 1.185  | 2.655  | 0.005  |
| HIF1A-AS3   | 1.753 | 1.172  | 2.621  | 0.006  |
| CXCL5       | 1.754 | 1.176  | 2.616  | 0.006  |
| ADAMTS14    | 1.751 | 1.174  | 2.614  | 0.006  |
| SPAG4       | 1.72  | 1.149  | 2.576  | 0.008  |
| TREML3P     | 1.721 | 1.151  | 2.574  | 0.008  |
| LINC01614   | 1.763 | 1.161  | 2.676  | 0.008  |
| SAA2        | 1.686 | 1.132  | 2.51   | 0.01   |
| TREM1       | 1.681 | 1.119  | 2.526  | 0.012  |
| LILRB3      | 1.668 | 1.117  | 2.491  | 0.012  |
| TNFAIP2     | 1.662 | 1.119  | 2.468  | 0.012  |
| CD300H      | 1.665 | 1.119  | 2.479  | 0.012  |
| SCNN1B      | 1.672 | 1.122  | 2.492  | 0.012  |
| VENTX       | 1.653 | 1.113  | 2.456  | 0.013  |
| RETN        | 1.661 | 1.115  | 2.474  | 0.013  |
| MARCO       | 1.657 | 1.113  | 2.468  | 0.013  |
| FCGR2B      | 1.63  | 1.099  | 2.418  | 0.015  |
| LOX         | 1.625 | 1.094  | 2.416  | 0.016  |
| LILRA5      | 1.634 | 1.093  | 2.442  | 0.017  |
| BDKRB2      | 1.62  | 1.084  | 2.423  | 0.019  |
| CFI         | 1.607 | 1.081  | 2.387  | 0.019  |
| CLEC5A      | 1.598 | 1.078  | 2.368  | 0.02   |
| SLC11A1     | 1.59  | 1.074  | 2.352  | 0.02   |
| C1R         | 1.599 | 1.078  | 2.373  | 0.02   |
| IBSP        | 1.606 | 1.079  | 2.39   | 0.02   |
| SAA1        | 1.602 | 1.071  | 2.397  | 0.022  |

|            |       |       |       |       |
|------------|-------|-------|-------|-------|
| BX640514.2 | 1.588 | 1.062 | 2.375 | 0.024 |
| AC007877.1 | 1.576 | 1.055 | 2.356 | 0.026 |
| SPP1       | 1.556 | 1.052 | 2.301 | 0.027 |
| NAMPT      | 1.533 | 1.032 | 2.276 | 0.034 |
| LUCAT1     | 1.534 | 1.03  | 2.285 | 0.035 |
| NDRG1      | 1.525 | 1.029 | 2.26  | 0.035 |
| RNASE2     | 1.533 | 1.029 | 2.283 | 0.036 |
| BIRC3      | 1.521 | 1.025 | 2.258 | 0.037 |
| S100A8     | 1.528 | 1.024 | 2.281 | 0.038 |
| COL5A1     | 1.524 | 1.024 | 2.268 | 0.038 |
| CSTA       | 1.513 | 1.022 | 2.241 | 0.039 |
| SLC16A3    | 1.511 | 1.019 | 2.241 | 0.04  |
| PELATON    | 1.506 | 1.018 | 2.227 | 0.04  |
| CEACAM4    | 1.524 | 1.019 | 2.28  | 0.04  |
| CD163      | 1.514 | 1.014 | 2.262 | 0.043 |
| ADAM8      | 1.499 | 1.012 | 2.222 | 0.044 |
| COL6A2     | 1.503 | 1.01  | 2.237 | 0.044 |
| CHI3L1     | 1.492 | 1.007 | 2.21  | 0.046 |
| CD300E     | 1.495 | 1.007 | 2.218 | 0.046 |
| PODNL1     | 1.493 | 1.005 | 2.217 | 0.047 |
| ICAM1      | 1.488 | 1.004 | 2.205 | 0.048 |
