# Supplementary material for: Identifying PLAUR as a Pivotal Gene of Tumor Microenvironment and Regulating Mesenchymal Phenotype of Glioblastoma
Source: MDPI journal article supplement (doi:10.3390/cancers16040840), 2024-02-19
Supplement: s1 [file s1]

**Table S3:** Information of antibodies and reagents used in IHC, IF, WB and Flow.

| Antibody or reagent                                        | Catalog Number | Dilution | Source                    |
|------------------------------------------------------------|----------------|----------|---------------------------|
| <b>IHC</b>                                                 |                |          |                           |
| uPAR Polyclonal antibody                                   | 10286-1-AP     | 1:100    | Proteintech               |
| <b>Flow</b>                                                |                |          |                           |
| CD11b Monoclonal Antibody (M1/70), PE-Cyanine7             | 25-0112-82     | 1:200    | Thermo Fisher Scientific  |
| CD163 Monoclonal Antibody (MAC 2-158), eFluor™ 450         | 48-1637-42     | 1:200    | Thermo Fisher Scientific  |
| Mouse IgG1 kappa Isotype Control (P3.6.2.8.1), eFluor™ 450 | 48-4714-82     | 1:200    | Thermo Fisher Scientific  |
| <b>IF</b>                                                  |                |          |                           |
| uPAR (D7X2N) Rabbit mAb                                    | 12713          | 1:50     | Cell Signaling Technology |
| CD163 Monoclonal antibody                                  | 68218-1-Ig     | 1:400    | Proteintech               |
| CD206 Monoclonal antibody                                  | 60143-1-Ig     | 1:400    | Proteintech               |
| Mounting Medium with DAPI                                  | ab104139       | /        | abcam                     |
| CoraLite488-conjugated Goat Anti-Mouse IgG(H+L)            | SA00013-1      | 1: 400   | Proteintech               |
| CoraLite594 – conjugated Goat Anti-Mouse IgG(H+L)          | SA00013-3      | 1: 400   | Proteintech               |
| <b>WB</b>                                                  |                |          |                           |
| uPAR (D7X2N) Rabbit mAb                                    | 12713          | 1:1000   | Cell Signaling Technology |
| CD44 (8E2) Mouse mAb                                       | 5640           | 1:1000   | Cell Signaling Technology |
| Vimentin (D21H3) XP® Rabbit mAb                            | 5741           | 1:3000   | Cell Signaling Technology |
| Beta Actin Monoclonal antibody                             | 66009-1-Ig     | 1:10000  | Proteintech               |
| HRP Goat Anti-Rabbit IgG (H+L)                             | AS014          | 1:5000   | Abclonal Technology       |
| HRP Goat Anti-Mouse IgG (H+L)                              | AS003          | 1:5000   | Abclonal Technology       |
| PageRuler Prestained Protein Ladder                        | 26616          | /        | Thermo Fisher Scientific  |
