# Supplementary material for: Identifying PLAUR as a Pivotal Gene of Tumor Microenvironment and Regulating Mesenchymal Phenotype of Glioblastoma
Source: MDPI journal article supplement (doi:10.3390/cancers16040840), 2024-02-19
Supplement: s1 [file s1]

**Table S4.** List of Pancancer immune metagenes.

| Cell type            | Metagene |
|----------------------|----------|
| Activated B cell     | ADAM28   |
|                      | CD180    |
|                      | CD79B    |
|                      | BLK      |
|                      | CD19     |
|                      | MS4A1    |
|                      | TNFRSF17 |
|                      | IGHM     |
|                      | GNG7     |
|                      | MICAL3   |
|                      | SPIB     |
|                      | HLA-DOB  |
|                      | IGKC     |
|                      | PNOC     |
|                      | FCRL2    |
|                      | BACH2    |
|                      | CR2      |
|                      | TCL1A    |
|                      | AKNA     |
|                      | ARHGAP25 |
|                      | CCL21    |
|                      | CD27     |
|                      | CD38     |
|                      | CLEC17A  |
|                      | CLEC9A   |
|                      | CLECL1   |
| Activated CD4 T cell | AIM2     |
|                      | BIRC3    |
|                      | BRIP1    |
|                      | CCL20    |
|                      | CCL4     |
|                      | CCL5     |
|                      | CCNB1    |
|                      | CCR7     |
|                      | DUSP2    |
|                      | ESCO2    |
|                      | ETS1     |
|                      | EXO1     |
|                      | EXOC6    |
|                      | IARS     |
|                      | ITK      |

|                           |           |
|---------------------------|-----------|
|                           | KIF11     |
|                           | KNTC1     |
|                           | NUF2      |
|                           | PRC1      |
|                           | PSAT1     |
|                           | RGS1      |
|                           | RTKN2     |
|                           | SAMSN1    |
|                           | SELL      |
|                           | TRAT1     |
|                           |           |
| Activated CD8 T cell      | ADRM1     |
|                           | AHSA1     |
|                           | C1GALT1C1 |
|                           | CCT6B     |
|                           | CD37      |
|                           | CD3D      |
|                           | CD3E      |
|                           | CD3G      |
|                           | CD69      |
|                           | CD8A      |
|                           | CETN3     |
|                           | CSE1L     |
|                           | GEMIN6    |
|                           | GNLY      |
|                           | GPT2      |
|                           | GZMA      |
|                           | GZMH      |
|                           | GZMK      |
|                           | IL2RB     |
|                           | LCK       |
|                           | MPZL1     |
|                           | NKG7      |
|                           | PIK3IP1   |
|                           | PTRH2     |
|                           | TIMM13    |
|                           | ZAP70     |
|                           |           |
| Central memory CD4 T cell | ABHD3     |
|                           | AHNAK     |
|                           | ANXA2P2   |
|                           | AQP3      |
|                           | ATHL1     |
|                           | BMI1      |
|                           | BZW2      |

|                            |           |
|----------------------------|-----------|
|                            | CD63      |
|                            | COL4A1    |
|                            | CYLD      |
|                            | ELMO2     |
|                            | FYN       |
|                            | GLIPR1    |
|                            | GSS       |
|                            | IFITM2    |
|                            | ITGB1     |
|                            | ITGB2     |
|                            | KLF5      |
|                            | LSP1      |
|                            | NDUFB9    |
|                            | PKM2      |
|                            | SFXN3     |
|                            | SIRPG     |
|                            | SMAD4     |
|                            | STX4      |
|                            | TRADD     |
|                            | VIM       |
|                            | XRCC6     |
| Central memory CD8 T cell  | ACTN4     |
|                            | ADAM12    |
|                            | ADCY9     |
|                            | F13A1     |
|                            | FCER1G    |
|                            | FCGR3B    |
|                            | FGF7      |
|                            | FKBP4     |
|                            | GLUD1     |
|                            | GM2A      |
|                            | GUSB      |
|                            | IL1RN     |
|                            | NOL11     |
|                            | NTRK1     |
|                            | RARA      |
|                            | RNF128    |
|                            | SIGLEC1   |
|                            | TNFRSF11A |
|                            | TOX4      |
|                            | UBA52     |
|                            | ULBP1     |
| Effector memory CD4 T cell | ATM       |

|                            |          |
|----------------------------|----------|
|                            | CASP3    |
|                            | CASQ1    |
|                            | CD300E   |
|                            | DARS     |
|                            | DOCK9    |
|                            | EXOSC9   |
|                            | EZH2     |
|                            | GDE1     |
|                            | IL34     |
|                            | NCOA4    |
|                            | NEFL     |
|                            | PDGFRL   |
|                            | PTGS1    |
|                            | REPS1    |
|                            | SCG2     |
|                            | SDPR     |
|                            | SIGLEC14 |
|                            | SIGLEC6  |
|                            | TAL1     |
|                            | TFEC     |
|                            | TIPIN    |
|                            | TPK1     |
|                            | UQCRB    |
|                            | USP9Y    |
|                            | WIPF1    |
|                            | ZCRB1    |
| Effector memory CD8 T cell | ACAP1    |
|                            | APOL3    |
|                            | ARHGAP10 |
|                            | ATP10D   |
|                            | C3AR1    |
|                            | CCR5     |
|                            | CD160    |
|                            | CD55     |
|                            | CFLAR    |
|                            | CMKLR1   |
|                            | DAPP1    |
|                            | FCRL6    |
|                            | FLT3LG   |
|                            | GZMM     |
|                            | HAPLN3   |
|                            | HLA-DMB  |
|                            | HLA-DPA1 |

|                    |          |
|--------------------|----------|
|                    | HLA-DPB1 |
|                    | IFI16    |
|                    | LIME1    |
|                    | LTK      |
|                    | NFKBIA   |
|                    | SETD7    |
|                    | SIK1     |
|                    | TRIB2    |
| Gamma delta T cell | ACP5     |
|                    | AQP9     |
|                    | BTN3A2   |
|                    | C1orf54  |
|                    | CARD8    |
|                    | CCL18    |
|                    | CD209    |
|                    | CD33     |
|                    | CD36     |
|                    | CDK5     |
|                    | IL10RB   |
|                    | KLRF1    |
|                    | LGALS1   |
|                    | MAPK7    |
|                    | KLHL7    |
|                    | KRT80    |
|                    | LAMC1    |
|                    | LCORL    |
|                    | LMNB1    |
|                    | MEIS3P1  |
|                    | MPL      |
|                    | FABP1    |
|                    | FABP5    |
|                    | FADD     |
|                    | MFAP3L   |
|                    | MINPP1   |
|                    | RPS24    |
|                    | RPS7     |
|                    | RPS9     |
|                    | DBNL     |
|                    | CCL13    |
| Immature B cell    | CD22     |
|                    | CYBB     |
|                    | FAM129C  |
|                    | FCRL1    |

|                   |          |
|-------------------|----------|
|                   | FCRL3    |
|                   | FCRL5    |
|                   | FCRLA    |
|                   | HDAC9    |
|                   | HLA-DQA1 |
|                   | HVCN1    |
|                   | KIAA0226 |
|                   | NCF1     |
|                   | NCF1B    |
|                   | P2RY10   |
|                   | SP100    |
|                   | TXNIP    |
|                   | STAP1    |
|                   | TAGAP    |
|                   | ZCCHC2   |
| Memory B cell     | AICDA    |
|                   | CCNA2    |
|                   | CDKN3    |
|                   | CLCN5    |
|                   | ENPP1    |
|                   | FCER1A   |
|                   | FCRL4    |
|                   | MYC      |
|                   | RUNX2    |
|                   | SORL1    |
|                   | SOX5     |
|                   | STAT5A   |
|                   | STAT5B   |
|                   | TLR9     |
| Regulatory T cell | CCL3L1   |
|                   | CD72     |
|                   | CLEC5A   |
|                   | FOXP3    |
|                   | ITGA4    |
|                   | L1CAM    |
|                   | LIPA     |
|                   | LRP1     |
|                   | LRRC42   |
|                   | MARCO    |
|                   | MMP12    |
|                   | MNDA     |
|                   | MRC1     |
|                   | MS4A6A   |

|                          |          |
|--------------------------|----------|
|                          | PELO     |
|                          | PLEK     |
|                          | PRSS23   |
|                          | PTGIR    |
|                          | ST8SIA4  |
|                          | STAB1    |
| T follicular helper cell | B3GAT1   |
|                          | CDK5R1   |
|                          | PDCD1    |
|                          | BCL6     |
|                          | CD200    |
|                          | CD83     |
|                          | CD84     |
|                          | FGF2     |
|                          | GPR18    |
|                          | CEBPA    |
|                          | CECR1    |
|                          | CLEC10A  |
|                          | CLEC4A   |
|                          | CSF1R    |
|                          | CTSS     |
|                          | DMN      |
|                          | DPP4     |
|                          | LRRC32   |
|                          | MC5R     |
|                          | MICA     |
|                          | NCAM1    |
|                          | NCR2     |
|                          | NRP1     |
|                          | PDCD1LG2 |
|                          | PDCD6    |
|                          | PRDX1    |
|                          | RAE1     |
|                          | RAET1E   |
|                          | SIGLEC7  |
|                          | SIGLEC9  |
|                          | TYRO3    |
|                          | CHST12   |
|                          | CLIC3    |
|                          | IVNS1ABP |
|                          | KIR2DL2  |
|                          | LGMN     |
| Type 1 T helper cell     | CD70     |

|  |          |
|--|----------|
|  | TBX21    |
|  | ADAM8    |
|  | AHCYL2   |
|  | ALCAM    |
|  | B3GALNT1 |
|  | BBS12    |
|  | BST1     |
|  | CD151    |
|  | CD47     |
|  | CD48     |
|  | CD52     |
|  | CD53     |
|  | CD59     |
|  | CD6      |
|  | CD68     |
|  | CD7      |
|  | CD96     |
|  | CFHR3    |
|  | CHRM3    |
|  | CLEC7A   |
|  | COL23A1  |
|  | COL4A4   |
|  | COL5A3   |
|  | DAB1     |
|  | DLEU7    |
|  | DOC2B    |
|  | EMP1     |
|  | F12      |
|  | FURIN    |
|  | GAB3     |
|  | GATM     |
|  | GFPT2    |
|  | GPR25    |
|  | GREM2    |
|  | HAVCR1   |
|  | HSD11B1  |
|  | HUNK     |
|  | IGF2     |
|  | RCSD1    |
|  | RYR1     |
|  | SAV1     |
|  | SELE     |
|  | SELP     |



|                       |          |
|-----------------------|----------|
|                       | SH3KBP1  |
|                       | SIT1     |
|                       | SLC35B3  |
|                       | SIGLEC10 |
|                       | SKAP1    |
|                       | THUMPD2  |
|                       | TIGIT    |
|                       | ZEB2     |
|                       | ENC1     |
|                       | FAM134B  |
|                       | FBXO30   |
|                       | FCGR2C   |
|                       | STAC     |
|                       | LTC4S    |
|                       | MAN1B1   |
|                       | MDH1     |
|                       | MMD      |
|                       | RGS16    |
|                       | IL12A    |
|                       | P2RX5    |
|                       | CD97     |
|                       | ITGB4    |
|                       | ICAM3    |
|                       | METRNL   |
|                       | TNFRSF1A |
|                       | IRF1     |
|                       | HTR2B    |
|                       | CALD1    |
|                       | MOCOS    |
|                       | TRAF3IP2 |
|                       | TLR8     |
|                       | TRAF1    |
|                       | DUSP14   |
| Type 17 T helper cell | IL17A    |
|                       | IL17RA   |
|                       | C2CD4A   |
|                       | C2CD4B   |
|                       | CA2      |
|                       | CCDC65   |
|                       | CEACAM3  |
|                       | IL17C    |
|                       | IL17F    |
|                       | IL17RC   |

|                      |          |
|----------------------|----------|
|                      | IL17RE   |
|                      | IL23A    |
|                      | ILDR1    |
|                      | LONRF3   |
|                      | SH2D6    |
|                      | TNIP2    |
|                      | ABCA1    |
|                      | ABCB1    |
|                      | ADAMTS12 |
|                      | ANK1     |
|                      | ANKRD22  |
|                      | B3GALT2  |
|                      | CAMTA1   |
|                      | CCR9     |
|                      | CD40     |
|                      | GPR44    |
|                      | IFT80    |
| Type 2 T helper cell | ASB2     |
|                      | CSRP2    |
|                      | DAPK1    |
|                      | DLC1     |
|                      | DNAJC12  |
|                      | DUSP6    |
|                      | GNAI1    |
|                      | LAMP3    |
|                      | NRP2     |
|                      | OSBPL1A  |
|                      | PDE4B    |
|                      | PHLDA1   |
|                      | PLA2G4A  |
|                      | RAB27B   |
|                      | RBMS3    |
|                      | RNF125   |
|                      | TMPRSS3  |
|                      | GATA3    |
|                      | BIRC5    |
|                      | CDC25C   |
|                      | CDC7     |
|                      | CENPF    |
|                      | CXCR6    |
|                      | DHFR     |
|                      | EVI5     |
|                      | GSTA4    |

|                                |          |
|--------------------------------|----------|
|                                | HELLS    |
|                                | IL26     |
|                                | LAIR2    |
| Activated dendritic cell       | ABCD1    |
|                                | C1QC     |
|                                | CAPG     |
|                                | CCL3L3   |
|                                | CD207    |
|                                | CD302    |
|                                | ATP5B    |
|                                | ATP5L    |
|                                | ATP6V1A  |
|                                | BCL2L1   |
|                                | C1QB     |
|                                | SNURF    |
|                                | SPCS3    |
|                                | CCNA1    |
|                                | CEACAM8  |
|                                | NOS2     |
|                                | SRA1     |
|                                | TNFRSF6B |
|                                | TREM1    |
|                                | TREML1   |
|                                | RHOA     |
|                                | SLC25A37 |
|                                | TNFSF14  |
|                                | TREML4   |
|                                | VNN2     |
|                                | XPO6     |
|                                | CLEC4C   |
|                                | TNFAIP2  |
|                                | UBD      |
|                                | ACTR3    |
|                                | RAB1A    |
|                                | SLA      |
|                                | HLA-DQA2 |
|                                | SIGLEC5  |
|                                | SLAMF9   |
| CD56bright natural killer cell | ABAT     |
|                                | C11orf75 |
|                                | C5orf15  |
|                                | CDHR1    |
|                                | DCAF12   |

|                             |         |
|-----------------------------|---------|
|                             | DYNLL1  |
|                             | GPR137B |
|                             | HCP5    |
|                             | HDGFRP2 |
|                             | KRT86   |
|                             | MLST8   |
|                             | ELMOD3  |
|                             | ENTPD5  |
|                             | FAM119A |
|                             | FAM179A |
|                             | CLIC2   |
|                             | COX7A2L |
|                             | CREB3L4 |
|                             | CSF1    |
|                             | CSNK2A2 |
|                             | CSTA    |
|                             | CSTB    |
|                             | CTPS    |
|                             | CTSD    |
|                             | FST     |
|                             | GATA2   |
|                             | GMPR    |
|                             | HDC     |
|                             | HEY1    |
|                             | HOXA1   |
|                             | HS2ST1  |
|                             | HS3ST1  |
|                             | BCL11B  |
|                             | CDH3    |
|                             | MYL6B   |
|                             | NAA16   |
|                             | CIQA    |
|                             | CIQB    |
|                             | CYP27B1 |
|                             | EIF3M   |
| CD56dim natural killer cell | CYP27A1 |
|                             | DDX55   |
|                             | DYRK2   |
|                             | RPL37A  |
|                             | NOTCH3  |
|                             | AKR7A3  |
|                             | GPRC5C  |
|                             | GRIN1   |

|                         |          |
|-------------------------|----------|
|                         | HLA-E    |
|                         | PORCN    |
|                         | PSMC4    |
|                         | UPP1     |
|                         | IL21R    |
|                         | KIR2DS1  |
|                         | KIR2DS2  |
|                         | KIR2DS5  |
| Eosinophil              | GIPR     |
|                         | KRT18P50 |
|                         | LRMP     |
|                         | FOSB     |
|                         | RRP12    |
|                         | GPR183   |
|                         | NR4A3    |
|                         | ST3GAL6  |
|                         | DEPDC5   |
|                         | PDE6C    |
|                         | PKD2L2   |
|                         | GPR65    |
|                         | IL5RA    |
|                         | P2RY14   |
|                         | DACH1    |
|                         | DAPK2    |
|                         | EMR3     |
| Immature dendritic cell | ACADM    |
|                         | AHCYL1   |
|                         | ALDH1A2  |
|                         | ALDH3A2  |
|                         | ALDH9A1  |
|                         | ALOX15   |
|                         | AMT      |
|                         | ARL1     |
|                         | ATIC     |
|                         | ATP5A1   |
|                         | CAPZA1   |
|                         | LILRA5   |
|                         | RDX      |
|                         | RRAGD    |
|                         | TACSTD2  |
|                         | INPP5F   |
|                         | RAB38    |
|                         | PLAU     |

|            |          |
|------------|----------|
|            | CSF3R    |
|            | SLC18A2  |
|            | AMPD2    |
|            | CLTB     |
|            | C1orf162 |
| Macrophage | AIF1     |
|            | CCL1     |
|            | CCL14    |
|            | CCL23    |
|            | CCL26    |
|            | CD300LB  |
|            | CNR1     |
|            | CNR2     |
|            | EIF1     |
|            | EIF4A1   |
|            | FPR1     |
|            | FPR2     |
|            | FRAT2    |
|            | GPR27    |
|            | GPR77    |
|            | RNASE2   |
|            | MS4A2    |
|            | BASP1    |
|            | IGSF6    |
|            | HK3      |
|            | VNN1     |
|            | FES      |
|            | NPL      |
|            | FZD2     |
|            | FAM198B  |
|            | HNMT     |
|            | SLC15A3  |
|            | CD4      |
|            | TXNDC3   |
|            | FRMD4A   |
|            | CRYBB1   |
|            | HRH1     |
|            | WNT5B    |
| Mast cell  | ADAMTS3  |
|            | CPA3     |
|            | CMA1     |
|            | CTSG     |
|            | ARHGAP15 |

|          |          |
|----------|----------|
|          | CPM      |
|          | FCN1     |
|          | FTL      |
|          | HSPA6    |
|          | ITGA9    |
|          | RNASE3   |
|          | S100A4   |
|          | SIGLEC8  |
|          | SLC6A4   |
|          | PTGS2    |
|          | EGR3     |
|          | PILRA    |
|          | CCR2     |
| MDSC     | CD14     |
|          | CD2      |
|          | CD86     |
|          | CXCR4    |
|          | FCGR2A   |
|          | FCGR2B   |
|          | FCGR3A   |
|          | FERMT3   |
|          | GPSM3    |
|          | IL18BP   |
|          | IL4R     |
|          | ITGAL    |
|          | ITGAM    |
|          | PARVG    |
|          | PSAP     |
|          | PTGER2   |
|          | PTGES2   |
|          | S100A8   |
|          | S100A9   |
|          | ASGR2    |
| Monocyte | CFP      |
|          | ASGR1    |
|          | CD1D     |
|          | UPK3A    |
|          | ACTG1    |
|          | ANXA5    |
|          | ATP6V1B2 |
|          | CFL1     |
|          | DAZAP2   |
|          | CTBS     |

|                     |          |
|---------------------|----------|
|                     | EMR4P    |
|                     | HIVEP2   |
|                     | MARCKSL1 |
|                     | MBP      |
|                     | MMP15    |
|                     | PNPLA6   |
|                     | TMBIM6   |
|                     | PQBP1    |
|                     | TEX264   |
|                     | IKZF1    |
| Natural killer cell | AKT3     |
|                     | AXL      |
|                     | BST2     |
|                     | CDH2     |
|                     | CRTAM    |
|                     | CSF2RA   |
|                     | CTSZ     |
|                     | CXCL1    |
|                     | CYTH1    |
|                     | DAXX     |
|                     | DGKH     |
|                     | DLL4     |
|                     | DPYD     |
|                     | ERBB3    |
|                     | F11R     |
|                     | FAM27A   |
|                     | FAM49A   |
|                     | FASLG    |
|                     | FCGR1A   |
|                     | FN1      |
|                     | FSTL1    |
|                     | FUCA1    |
|                     | GBP3     |
|                     | GLS2     |
|                     | GRB2     |
|                     | LST1     |
|                     | BCL2     |
|                     | CDC5L    |
|                     | FGF18    |
|                     | FUT5     |
|                     | FZR1     |
|                     | GAGE2    |
|                     | IGFBP5   |



|                       |          |
|-----------------------|----------|
| Natural killer T cell | KANK2    |
|                       | LDB3     |
|                       | BTN2A2   |
|                       | CD101    |
|                       | CD109    |
|                       | CNPY3    |
|                       | CNPY4    |
|                       | CREB1    |
|                       | CRTC2    |
|                       | CRTC3    |
|                       | CSF2     |
|                       | KLRC1    |
|                       | FUT4     |
|                       | ICAM2    |
|                       | IL32     |
|                       | LAMP2    |
|                       | LILRB5   |
|                       | KLRG1    |
|                       | HSPA4    |
|                       | HSPB6    |
|                       | ISM2     |
|                       | ITIH2    |
|                       | KDM4C    |
|                       | KIR2DS4  |
|                       | KIRREL3  |
|                       | SDCBP    |
|                       | NFATC2IP |
|                       | MICB     |
|                       | KIR2DL1  |
|                       | KIR2DL3  |
|                       | KIR3DL1  |
|                       | KIR3DL2  |
|                       | NCR1     |
|                       | FOSL1    |
|                       | TSLP     |
|                       | SLC7A7   |
|                       | SPP1     |
|                       | TREM2    |
|                       | UBASH3A  |
|                       | YBX2     |
|                       | CCDC88A  |
|                       | CLEC1A   |
|                       | THBD     |

|                             |           |
|-----------------------------|-----------|
|                             | PDPN      |
|                             | VCAM1     |
|                             | EMR1      |
| Neutrophil                  | CREB5     |
|                             | CDA       |
|                             | CHST15    |
|                             | S100A12   |
|                             | APOBEC3A  |
|                             | CASP5     |
|                             | MMP25     |
|                             | HAL       |
|                             | C1orf183  |
|                             | FFAR2     |
|                             | MAK       |
|                             | CXCR1     |
|                             | STEAP4    |
|                             | MGAM      |
|                             | BTNL8     |
|                             | CXCR2     |
|                             | TNFRSF10C |
|                             | VNN3      |
| Plasmacytoid dendritic cell | CBX6      |
|                             | DAB2      |
|                             | DDX17     |
|                             | HIGD1A    |
|                             | IDH3A     |
|                             | IL3RA     |
|                             | MAGED1    |
|                             | NUCB2     |
|                             | OFD1      |
|                             | OGT       |
|                             | PDIA4     |
|                             | SERTAD2   |
|                             | SIRPA     |
|                             | TMED2     |
|                             | ENG       |
|                             | FCAR      |
|                             | IGF1      |
|                             | ITGA2B    |
|                             | GABARAP   |
|                             | GPX1      |
|                             | KRT23     |
|                             | PROK2     |

|  |         |
|--|---------|
|  | RALB    |
|  | RETNLB  |
|  | RNF141  |
|  | SEC14L1 |
|  | SEPX1   |
|  | EMP3    |
|  | CD300LF |
|  | ABTB1   |
|  | KLHL21  |
|  | PHRF1   |
|  |         |
