# Supplementary material for: Identifying PLAUR as a Pivotal Gene of Tumor Microenvironment and Regulating Mesenchymal Phenotype of Glioblastoma
Source: MDPI journal article supplement (doi:10.3390/cancers16040840), 2024-02-19
Supplement: s1 [file s1]

**Table S1:** Clinical characteristics of glioma patient's cohort and applications

The tumor samples were taken from patients operated on at The Second Affiliated Hospital of Zhejiang University School of Medicine for which enough tissue could be obtained for research. No further selection criteria were used.

| Name    | Sex    | Location                   | Diagnosis      | Primary or Recurrence | IDH             | MGMT           | Application                        |
|---------|--------|----------------------------|----------------|-----------------------|-----------------|----------------|------------------------------------|
| SZ21009 | Male   | right temporal             | GBM(4)         | Primary               | WT              | non-methylated | IHC,IF                             |
| SZ22002 | Male   | right frontal              | GBM(4)         | Primary               | WT              | non-methylated | IHC,IF                             |
| SZ22017 | Male   | left frontal and temporal  | GBM(4)         | Recurrence            | WT              | non-methylated | IHC                                |
| SZ22031 | Female | right temporal and insular | Astrocytoma(3) | Primary               | IDH1(R132H) MUT | /              | IHC                                |
| GBM129  | Female | left frontal               | GBM(4)         | Primary               | WT              | methylated     | patient-derived glioblastoma cells |
