# Supplementary material for: Identifying PLAUR as a Pivotal Gene of Tumor Microenvironment and Regulating Mesenchymal Phenotype of Glioblastoma
Source: MDPI journal article supplement (doi:10.3390/cancers16040840), 2024-02-19
Supplement: s1 [file s1]

**Table S6:** Lasso Coefficient Profiles of 5 Prognostic Genes.

|             |         |         |         |         |          |
|-------------|---------|---------|---------|---------|----------|
| Gene        | PLAUR   | HSPA7   | MT1H    | PODNL1  | PDZK1IP1 |
| Coefficient | 0.19580 | 0.05812 | 0.00368 | 0.09486 | 0.00634  |
