# Supplementary material for: Identifying PLAUR as a Pivotal Gene of Tumor Microenvironment and Regulating Mesenchymal Phenotype of Glioblastoma
Source: MDPI journal article supplement (doi:10.3390/cancers16040840), 2024-02-19
Supplement: s1 [file s1]

**Table S2:** Information of qPCR primers and RNA interfering target sequences.

| RNA interfering      | Target Sequence             | Source                      |
|----------------------|-----------------------------|-----------------------------|
| homo-siPLAUR#1       | 5'-GCCGUUACCUCGAAUGCAU-3'   | GenePharma, Shanghai, China |
| homo-siPLAUR#2       | 5'-CACTCTCCTCTGGACCTAAAC-3' | GenePharma, Shanghai, China |
| Lentiviral shPLAUR#1 | 5'-GCCGUUACCUCGAAUGCAU-3'   | GeneChem, Shanghai, China   |
| Lentiviral shPLAUR#2 | 5'-CACTCTCCTCTGGACCTAAAC-3' | GeneChem, Shanghai, China   |

| qPCR primers  | Sequence (5' to 3')      |
|---------------|--------------------------|
| OSM Forward   | TATAGGCAGCTGCTCGAAAG     |
| OSM Reverse   | CAGTTTAGGAACATCCAGGC     |
| ICAM1 Forward | GACTAAGCCAAGAGGAAGGAGCAA |
| ICAM1 Reverse | TCAGCATACCCAATAGGCAGCAAG |
| ACTB Forward  | CATGTACGTTGCTATCCAGGC    |
| ACTB Reverse  | CTCCTTAATGTCACGCACGAT    |
